# Supplementary material
Source: publisher site journal article supplement (https://www.spandidos-publications.com/5435/downloadSupplementary)

Figure S1. FGF23 suppresses apoptosis, which is reversed by LY294002 in SCI model rats. (A) Representative images and (B) quantification of the TUNEL-positive cells among the sham, SCI, SCI + oeNC, SCI + oeFGF23 and SCI + oeFGF23 + LY294002 groups. \* $P < 0.05$  and \*\*\* $P < 0.001$ . FGF23, fibroblast growth factor 23; NC, negative control; NS, not significant; oe, overexpression; p-, phosphorylated; SCI, spinal cord injury.

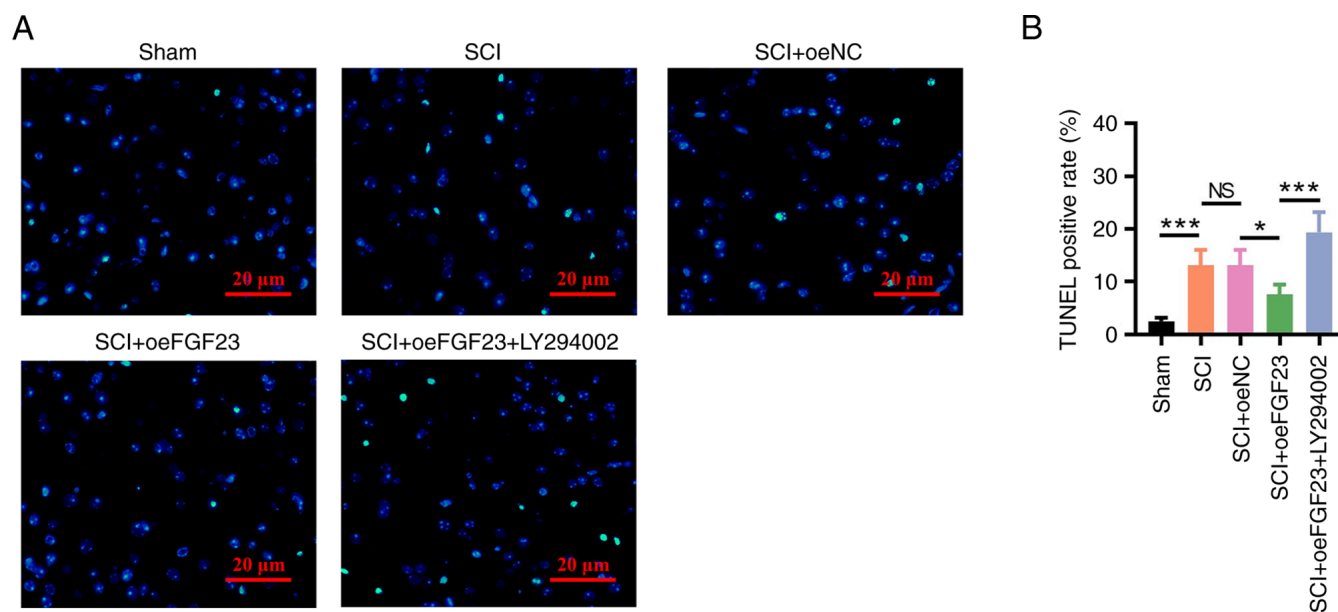

Supplement: Supplementary file 1 [file downloadSupplementary]
